# Supplementary material
Source: publisher figshare collection journal article supplement (https://karger.figshare.com/ndownloader/files/28480578)
Supplement: Supplementary file 1 [file 28480578]

**Supplementary Table 1.** Systematic review checklist.

| **Section/Topic** | **Reported on Page** |
| --- | --- |
| **TITLE** | Page 1, line 1-2 |
| **ABSTRACT** | Page 3, line 1-22  Page 4, line 1 |
| **INTRODUCTION** |  |
| Rationale | Page 5, line 1-22  Page 6, line 1-4 |
| Objectives | Page 6, line 5-7 |
| **METHODS** |  |
| Eligibility criteria | Page 7, line 1-3 |
| Information sources | Page 6, line 12-13 |
| Search | Page 6, line 15-18 |
| Study selection | Page 7, line 1-3 |
| Data collection process | Page 7, line 5-9 |
| Data items | Table 1 |
| Risk of bias in individual studies | Page 7, line 11-16 |
| Summary measures | Page 7, line 18-20 |
| Synthesis of results | Page 7, line 21-22  Page 8, line 1-8 |
| Risk of bias across studies | Page 8, line 8-11 |
| Additional analyses | Page 8, line 6-8 |
| **RESULTS** |  |
| Study selection | Page 8, line 18-22  Page 9, line 1-3 |
| Study characteristics | Page 9, line 5-16 |
| Risk of bias within studies | Page 9, line 18-22 |
| Results of individual studies | Page 10, line 6-9  Page 11, line 13-17 |
| Synthesis of results | Page 10, line 9-22  Page 11, line 1-9  Page 11, line 17-22  Page 12, line 1-6  Page 12, line 11-13 |
| Risk of bias across studies | Page 13, line 13-14 |
| Additional analysis | Page 12, line 15-22  Page 13, line 1-11 |
| **DISCUSSION** |  |
| Summary of evidence | Page 13, line 17-21 |
| Limitations | Page 18, line 9-15 |
| Conclusions | Page 18, line 18-22 |
| **FUNDING** | Page 19, line 9-10 |
